# Supplementary material for: In silico identification of SARS-CoV-2 spike (S) protein–ACE2 complex inhibitors from eight Tecoma species and cultivars analyzed by LC-MS
Source: Royal Society of Chemistry journal article supplement (doi:10.1039/d0ra08997d), 2020-01-01

### Supplementary material

**Table S1:** List of *Tecoma* species and cultivars under study along with their collection areas and voucher specimen codes.

| <b>Plant name</b>                        | <b>Collection area</b>                                                       | <b>Voucher specimen codes</b> |
|------------------------------------------|------------------------------------------------------------------------------|-------------------------------|
| <i>Tecoma capensis</i> Lindl.            | St. Mina monastery garden, King Mariot, Borg El Arab, Alexandria, Egypt      | No. 11-1-2017I                |
| <i>T. capensis</i> var. yellow           | Mazhar Botanical garden, 26 <sup>th</sup> July corridor, Imbaba, Giza, Egypt | No. 11-1-2017II               |
| <i>T. capensis</i> var. harmony          | Mazhar Botanical garden, 26 <sup>th</sup> July corridor, Imbaba, Giza, Egypt | No. 11-1-2017III              |
| <i>T. grandiflora</i> Loisel.            | Mazhar Botanical garden, 26 <sup>th</sup> July corridor, Imbaba, Giza, Egypt | No. 11-1-2017IV               |
| <i>T. radicans</i> (L.) Juss.            | Antonyades Botanical Garden, Alexandria, Egypt                               | No. 11-1-2017V                |
| <i>T. capensis</i> var. pink             | Mazhar Botanical garden, 26 <sup>th</sup> July corridor, Imbaba, Giza, Egypt | No. 11-1-2017VI               |
| <i>T. capensis</i> var. red              | Mazhar Botanical garden, 26 <sup>th</sup> July corridor, Imbaba, Giza, Egypt | No. 11-1-2017VII              |
| <i>Tecoma</i> × <i>smithii</i> W. Watson | El-Orman Botanical garden, Giza, Egypt.                                      | No. 11-1-2017VIII             |



(c)

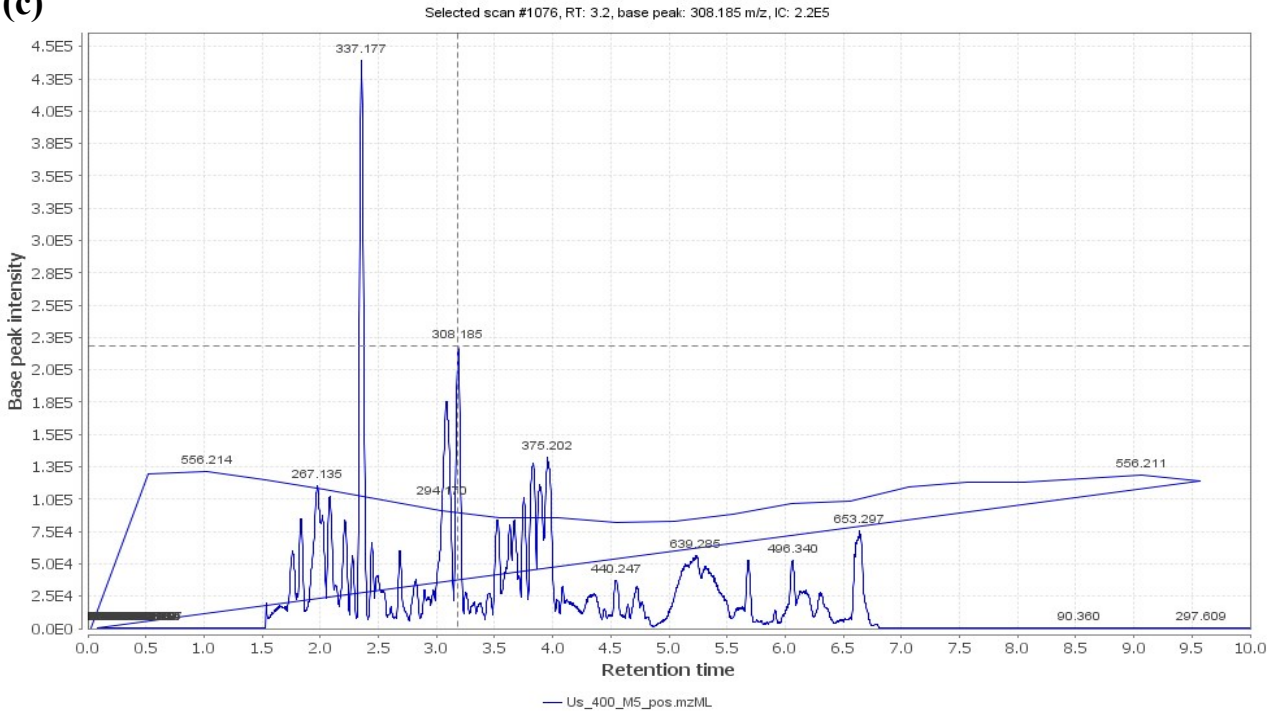

(d)

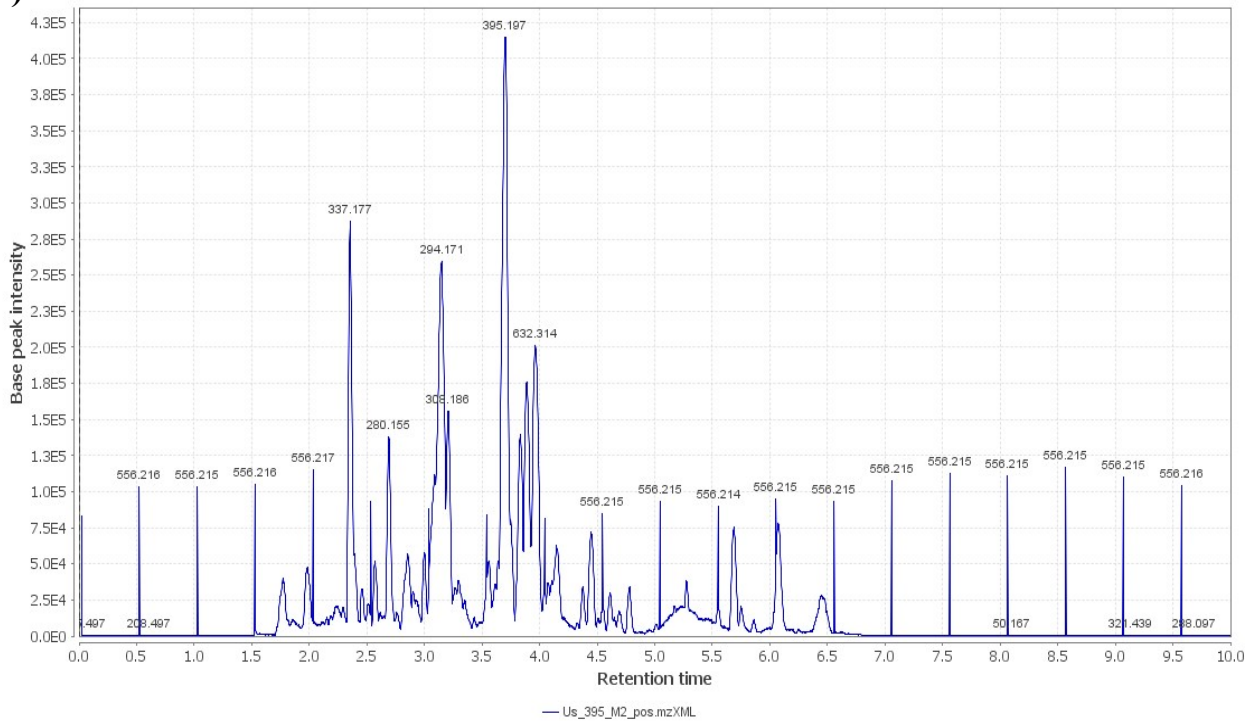

(e)

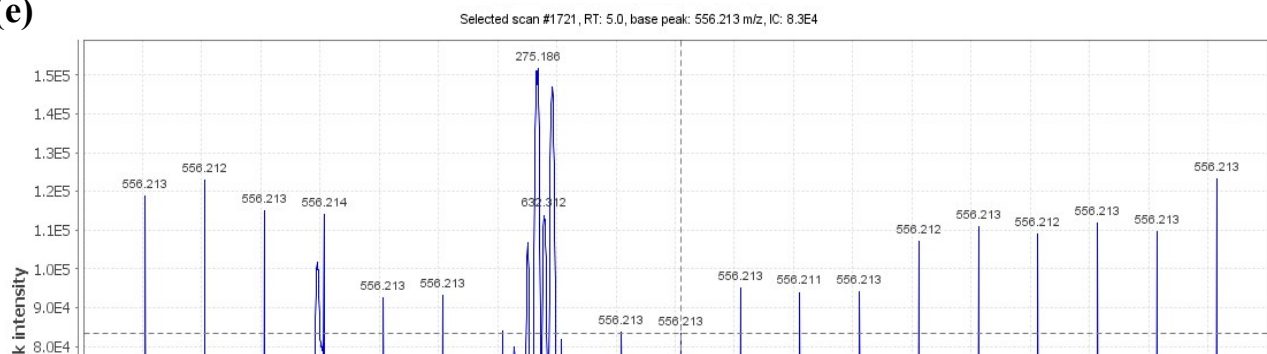

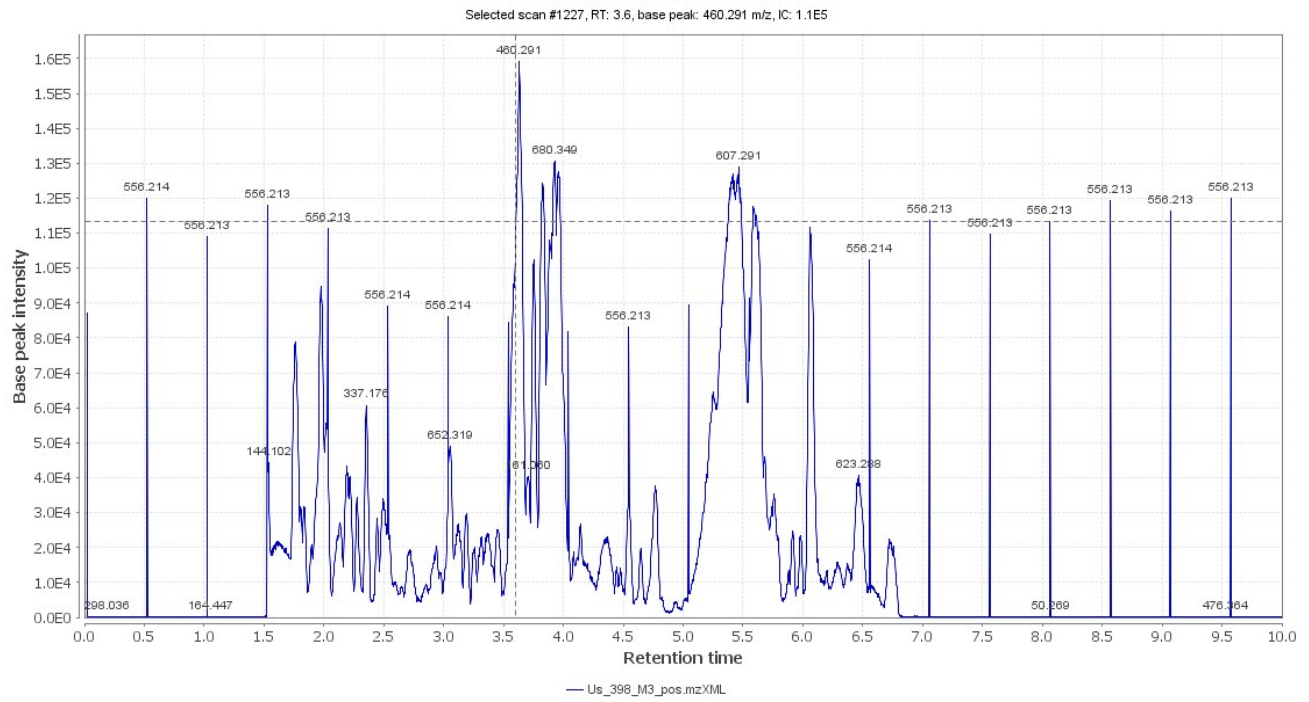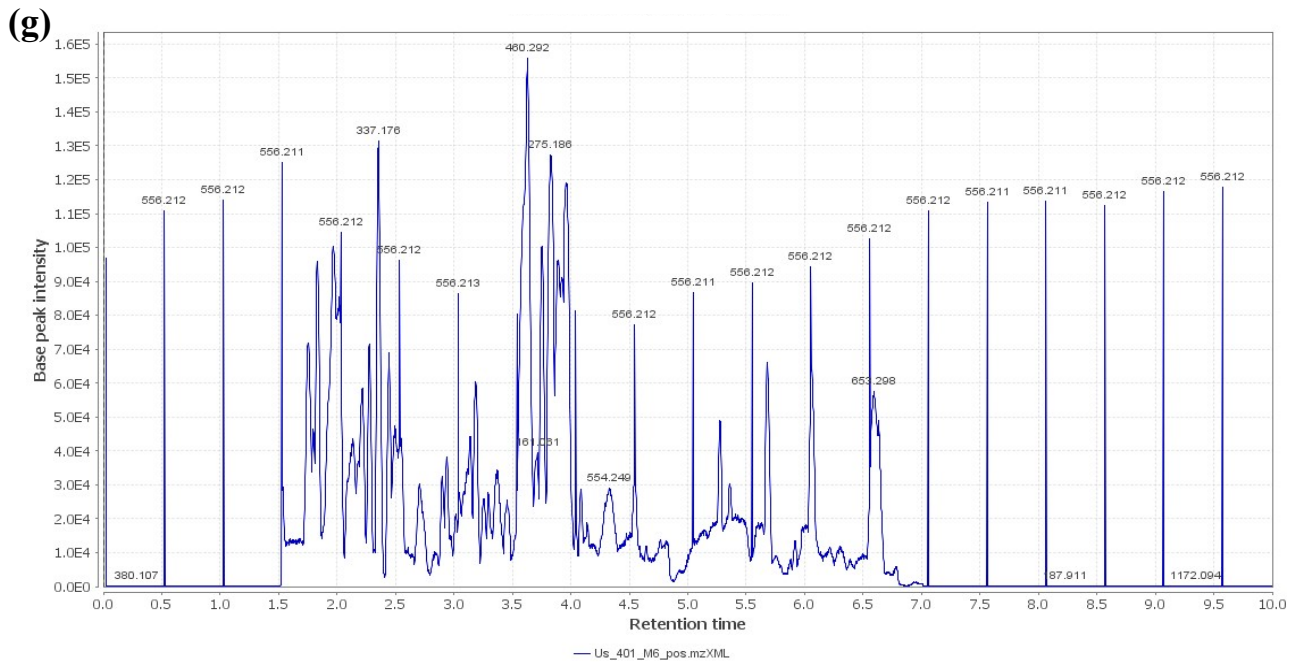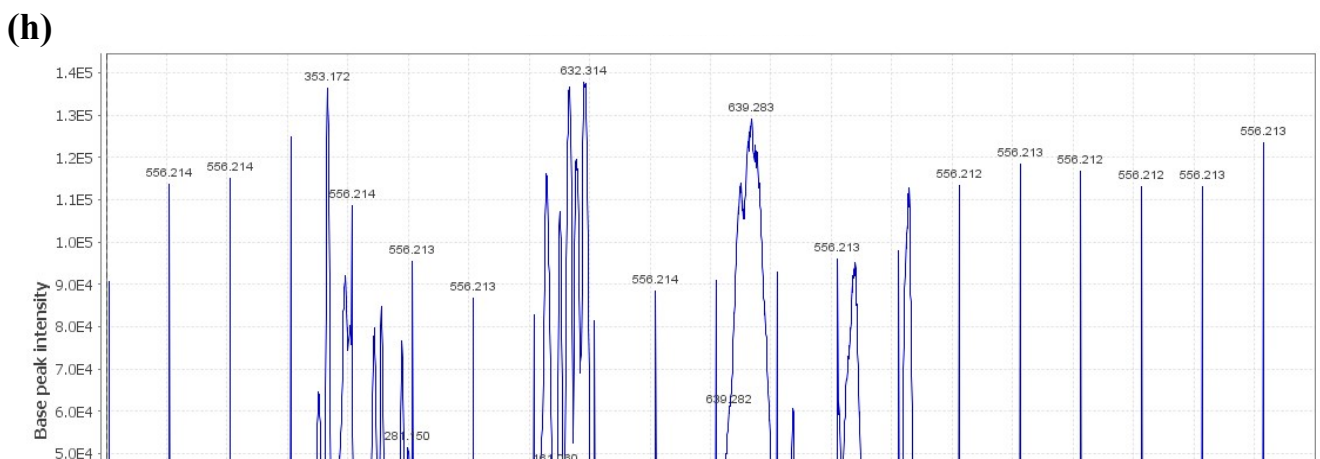

Supplement: d0ra08997d1.pdf [file d0ra08997d1.pdf]
